# Supplementary material for: The Expression of Key Ethylene and Anthocyanin Biosynthetic Genes of ‘Honeycrisp’ Apples Subjected to the Combined Use of Reflective Groundcovers and Aminoethoxyvinylglycine in the Mid-Atlantic US
Source: MDPI journal article supplement (doi:10.3390/plants13081141), 2024-04-19
Supplement: s1 [file s1]

**Supplementary Table S1.** Primers used in qRT-PCR

| Gene name      | Description                                      | Primer orientation | Primer sequence (5' to 3') |
|----------------|--------------------------------------------------|--------------------|----------------------------|
| <i>MdPAL</i>   | Phenylalanine ammonia-lyase                      | Forward            | GTGCTGTGGAGTCCCCGCTT       |
|                |                                                  | Reverse            | GGTGA GGCTCTCTCCGCCAAGT    |
| <i>MdCHS</i>   | Chalcone synthase                                | Forward            | GGAGACAACTGGAGAAGGACTGGAA  |
|                |                                                  | Reverse            | CGACATTGATACTGGTGCTTCA     |
| <i>MdCHI</i>   | Chalcone isomerase                               | Forward            | GGGATAACCTCGCGGCCAAA       |
|                |                                                  | Reverse            | GCATCCATGCCGGAAGCTACAA     |
| <i>MdF3H</i>   | Flavanone 3-hydroxylase                          | Forward            | TGGAAGCTTGTGAGGACTGGGGT    |
|                |                                                  | Reverse            | CTCCTCCGATGGCAAATCAAAGA    |
| <i>MdDFR</i>   | Dihydroflavonol 4-reductase                      | Forward            | GATAGGGTTTGAGTTCAAGTA      |
|                |                                                  | Reverse            | TCTCCTCAGCAGCCTCAGTTTTCT   |
| <i>MdLDOX</i>  | Leucoanthocyanidin dioxygenase                   | Forward            | CCAAGTGAAGCGGGTTGTGCT      |
|                |                                                  | Reverse            | CAAAGCAGGCGGACAGGAGTAGC    |
| <i>MdUGT</i>   | UDP glucose-flavonoid 3- o -glucosyl transferase | Forward            | CCACCGCCCTTCCAAACACTCT     |
|                |                                                  | Reverse            | CACCCTTATGTTACGCGGCATGT    |
| <i>MdMYB10</i> | Transcription factor                             | Forward            | TGCCTGGACTCGAGAGGAAGACA    |
|                |                                                  | Reverse            | CCTGTTTCCCAAAAGCCTGTGAA    |
| <i>MdACSI</i>  | 1-aminocyclopropane-carboxylase (ACC) synthase   | Forward            | CTCCTCCTTTCCTTCGTTGA       |
|                |                                                  | Reverse            | ACCATGTCGTCGTTGGAGTAG      |
| <i>MdACO1</i>  | ACC oxidase                                      | Forward            | ATCAATGATGCTTGTGAGAACTG    |
|                |                                                  | Reverse            | GGTCTTCTTGTAAGTATCCTTGG    |
| <i>MdACT</i>   | Actin                                            | Forward            | TGACCGAATGAGCAAGGAAATTACT  |
|                |                                                  | Reverse            | TACTCAGCTTTGGCAATCCACATC   |
